# Supplementary material for: European Myeloma Network recommendations on tools for the diagnosis and monitoring of multiple myeloma: what to use and when
Source: PubMed Central journal article supplement — Haematologica. 2018 Aug 31;103(11):1772–84. doi: 10.3324/haematol.2018.189159 (PMC6278986; doi:10.3324/haematol.2018.189159), 2018-11
Supplement: HAEMATOL-2018-189159v4-Caers-01.pdf [file HAEMATOL-2018-189159v4-Caers-01.pdf]

# Diagnostic criteria for multiple myeloma recommended by the European Myeloma Network (EMN)

The diagnosis of multiple myeloma requires close collaboration between multiple disciplines

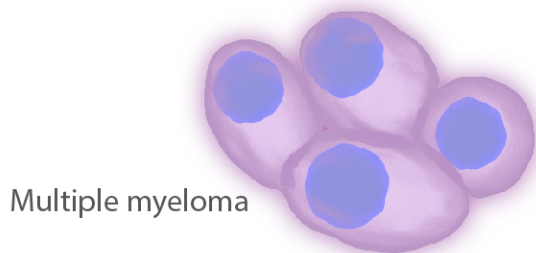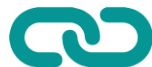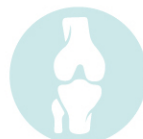

Orthopedics

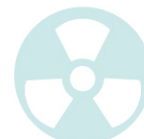

Radiation  
therapy

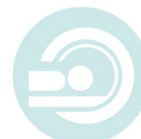

Radiology

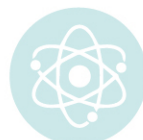

Nuclear  
medicine

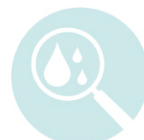

Hematology

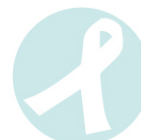

Oncology

## EMN Recommendations: diagnostic sites and tools

### Bone marrow

- BM cytology and biopsy to confirm plasmacytosis and monoclonality
- Flow cytometry
- Cytogenetics
- Advanced techniques: GEP, NGS

### Blood

- Blood count and blood smear
- Serum electrophoresis and IF
- Serum Free Light Chain
- Serum Immunoglobulin levels
- Renal and liver function tests
- Calcium
- Lactate dehydrogenase
- Albumin,  $\beta$ 2-MG

### Urine

- Urine sample to check for proteinuria and Bence-Jones
- 24 h urine collection

### Imaging

- Low dose Whole-body CT
- PET/CT
- Whole-body MRI

Prompt diagnosis and close follow-up of multiple myeloma patients remains highly relevant and contribute to better survival
